# Supplementary material for: Cross-cultural adaptation and validation of the Amsterdam Instrumental Activities of Daily Living questionnaire short version German for Switzerland
Source: PubMed Central journal article supplement (PMC7530958; doi:10.1186/s12955-020-01576-w), 2020-10-02
Supplement: 12955_2020_1576_MOESM1_ESM.pdf [file 12955_2020_1576_MOESM1_ESM.pdf]

**Additional table 1 – GRM Item parameters and item information values**

| Item no. | Item                                 | Item parameters |            |            |           |            | Item information |
|----------|--------------------------------------|-----------------|------------|------------|-----------|------------|------------------|
|          |                                      | $\alpha$        | $\beta_1$  | $\beta_2$  | $\beta_3$ | $\beta_4$  |                  |
| Q1       | Carrying out household duties        | 1.75±0.09       | -0.31±0.06 | 0.83±0.14  | 1.82±1.04 | 2.81±8.15  | 4.61             |
| Q2       | Doing the shopping                   | 2.35±0.12       | -0.33±0.05 | 0.67±0.11  | 1.42±0.95 | 1.96±4.90  | 6.10             |
| Q3       | Buying the correct articles          | 2.06±0.11       | -0.15±0.05 | 0.85±0.17  | 1.32±0.78 | 1.45±2.23  | 4.11             |
| Q4       | Cooking                              | 2.30±0.12       | -0.20±0.05 | 0.75±0.14  | 1.28±0.79 | 1.73±2.82  | 5.40             |
| Q5       | Preparing sandwich meals             | 1.94±0.13       | 1.05±0.06  | 1.84±1.64  | 2.49±8.40 | 2.89±30.47 | 4.14             |
| Q6       | Making minor repairs to the house    | 2.58±0.13       | -0.48±0.05 | 0.32±0.05  | 0.76±0.26 | 1.01±0.73  | 5.62             |
| Q7       | Operating domestic appliances        | 2.29±0.13       | 0.32±0.05  | 1.27±0.55  | 1.99±3.98 | 2.58±22.59 | 5.85             |
| Q6       | Operating the microwave              | 2.01±0.12       | 0.69±0.05  | 1.36±0.67  | 1.88±2.57 | 2.08±7.32  | 3.79             |
| Q9       | Operating the coffee maker           | 1.90±0.13       | 1.05±0.06  | 2.01±1.99  | 2.49±9.67 | 2.71±26.54 | 3.78             |
| Q10      | Operating the washing machine        | 1.91±0.12       | 0.91±0.06  | 1.73±1.20  | 2.12±4.65 | 2.18±15.26 | 3.36             |
| Q11      | Paying bills                         | 3.50±0.19       | -0.01±0.04 | 0.60±0.18  | 0.90±0.83 | 1.13±2.26  | 7.76             |
| Q12      | Using a mobile phone                 | 2.02±0.11       | -0.04±0.05 | 0.90±0.19  | 1.64±1.17 | 2.37±6.58  | 5.03             |
| Q13      | Managing the paperwork               | 3.32±0.18       | -0.54±0.04 | 0.34±0.04  | 0.72±0.34 | 0.96±1.05  | 8.06             |
| Q14      | Using electronic banking             | 2.96±0.16       | -0.01±0.04 | 0.66±0.17  | 0.94±0.72 | 1.25±1.88  | 6.35             |
| Q15      | Using a PIN code                     | 1.93±0.12       | 0.63±0.05  | 1.44±0.65  | 1.87±2.55 | 2.14±6.59  | 3.73             |
| Q16      | Obtaining money from an ATM          | 2.13±0.14       | 0.90±0.05  | 1.51±1.11  | 1.75±3.50 | 1.88±7.37  | 3.56             |
| Q17      | Paying using cash                    | 1.98±0.13       | 0.96±0.06  | 1.74±1.36  | 2.17±5.51 | 2.56±15.43 | 3.97             |
| Q18      | Making appointments                  | 2.01±0.11       | -0.33±0.05 | 0.50±0.08  | 1.20±0.46 | 1.64±1.63  | 4.49             |
| Q19      | Filling in forms                     | 2.63±0.13       | -0.62±0.05 | 0.43±0.05  | 0.91±0.39 | 1.27±1.26  | 6.42             |
| Q20      | Working                              | 1.52±0.09       | -1.06±0.08 | -0.05±0.06 | 0.47±0.12 | 0.74±0.29  | 2.83             |
| Q21      | Using a computer                     | 2.68±0.14       | -0.33±0.05 | 0.56±0.09  | 1.07±0.62 | 1.60±2.77  | 6.84             |
| Q22      | Emailing                             | 2.68±0.15       | 0.07±0.04  | 0.79±0.22  | 1.11±0.91 | 1.30±2.23  | 5.43             |
| Q23      | Printing documents                   | 2.48±0.15       | 0.26±0.04  | 0.86±0.28  | 1.15±0.95 | 1.31±2.12  | 4.53             |
| Q24      | Operating devices                    | 2.71±0.15       | -0.01±0.04 | 1.10±0.45  | 1.85±4.96 | 2.29±27.15 | 7.43             |
| Q25      | Operating the remote control         | 1.61±0.10       | 0.37±0.06  | 1.53±0.48  | 2.53±3.46 | 3.20±18.10 | 3.85             |
| Q26      | Playing card and board games         | 1.23±0.08       | -0.29±0.07 | 1.12±0.18  | 1.89±0.81 | 2.30±2.21  | 2.46             |
| Q27      | Driving a car                        | 1.53±0.09       | -0.22±0.06 | 0.83±0.14  | 1.24±0.53 | 1.52±1.14  | 2.83             |
| Q28      | Using a sat-nav system               | 2.13±0.12       | -0.13±0.05 | 0.75±0.15  | 1.09±0.62 | 1.40±1.39  | 4.28             |
| Q29      | Using public transportation          | 2.11±0.12       | 0.21±0.05  | 1.05±0.30  | 1.58±1.39 | 1.84±4.06  | 4.37             |
| Q30      | Being responsible for own medication | 1.50±0.09       | 0.15±0.06  | 1.17±0.26  | 2.09±1.36 | 2.84±6.17  | 3.39             |

Item parameters and item information values estimated in the Dutch reference sample used for differential item functioning detection in the Swiss sample. Item parameters are shown as parameter  $\pm$  standard error

Abbreviations: GRM, Graded Response Model;  $\alpha$ , discrimination parameter;  $\beta$ 's, extremity parameters
