# Supplementary material for: Cross-cultural adaptation and validation of the Amsterdam Instrumental Activities of Daily Living questionnaire short version German for Switzerland
Source: PubMed Central journal article supplement (PMC7530958; doi:10.1186/s12955-020-01576-w), 2020-10-02
Supplement: 12955_2020_1576_MOESM2_ESM.pdf [file 12955_2020_1576_MOESM2_ESM.pdf]

**Additional table 2 – Investigation of local independence**

| <b>Item 1</b> | <b>Item 2</b> | <b>Residual</b> |
|---------------|---------------|-----------------|
| Q 8           | Q13           | -0.279          |
| Q 9           | Q16           | -0.258          |
| Q10           | Q16           | -0.367          |
| Q14           | Q17           | 0.252           |
| Q15           | Q23           | -0.273          |

Item pairs with large residuals ( $> 0.25$ ) in the one-factor model fit
