# Supplementary material for: Cross-cultural adaptation and validation of the Amsterdam Instrumental Activities of Daily Living questionnaire short version German for Switzerland
Source: PubMed Central journal article supplement (PMC7530958; doi:10.1186/s12955-020-01576-w), 2020-10-02
Supplement: 12955_2020_1576_MOESM4_ESM.pdf [file 12955_2020_1576_MOESM4_ESM.pdf]

**Additional table 3 – Differential Item Functioning based on empirical data**

| Item       | Chi-Square<br><i>p</i> -Value | Mcfadden's<br>$\Delta R^2$ |
|------------|-------------------------------|----------------------------|
| Q1         | 0.239                         | 0.001                      |
| <b>Q2</b>  | <b>0.001</b>                  | <b>0.008</b>               |
| Q3         | 0.356                         | 0.002                      |
| Q4         | 0.357                         | < 0.001                    |
| Q5         | 0.844                         | < 0.001                    |
| Q6         | 0.632                         | < 0.001                    |
| Q7         | 0.288                         | 0.001                      |
| Q8         | 0.921                         | < 0.001                    |
| Q9         | 0.597                         | < 0.001                    |
| Q10        | 0.535                         | 0.002                      |
| Q11        | 0.942                         | < 0.001                    |
| Q12        | 0.926                         | < 0.001                    |
| Q13        | 0.272                         | 0.002                      |
| Q14        | 0.072                         | 0.005                      |
| Q15        | 0.404                         | < 0.001                    |
| Q16        | 0.097                         | 0.007                      |
| Q17        | 0.802                         | < 0.001                    |
| Q18        | 0.422                         | < 0.001                    |
| Q19        | 0.133                         | < 0.001                    |
| <b>Q20</b> | <b>&lt; 0.001</b>             | <b>0.019</b>               |
| Q21        | 0.265                         | 0.001                      |
| Q22        | 0.067                         | 0.003                      |
| <b>Q23</b> | <b>0.002</b>                  | <b>0.015</b>               |
| Q24        | 0.105                         | 0.003                      |
| Q25        | 0.183                         | 0.002                      |
| Q26        | 0.137                         | 0.002                      |
| Q27        | 0.905                         | < 0.001                    |
| Q28        | 0.364                         | < 0.001                    |
| Q29        | 0.888                         | < 0.001                    |
| Q30        | 0.320                         | < 0.001                    |

Chi-square and McFadden's  $\Delta R^2$  values as obtained in differential item functioning (DIF) analyses from the empirical data. Items flagged for DIF are displayed italic in blue. Empirical cut-offs were set a priori at  $\alpha < .01$  for statistically significant DIF, and  $\Delta R^2 > .035$  for clinically meaningful DIF
