# Supplementary material for: Cross-cultural adaptation and validation of the Amsterdam Instrumental Activities of Daily Living questionnaire short version German for Switzerland
Source: PubMed Central journal article supplement (PMC7530958; doi:10.1186/s12955-020-01576-w), 2020-10-02
Supplement: 12955_2020_1576_MOESM5_ESM.pdf [file 12955_2020_1576_MOESM5_ESM.pdf]

**Additional table 4 - Differential Item Functioning Monte Carlo Simulations**

| Item       | Chi-Square<br><i>p</i> -Value | Mcfadden's<br>$\Delta R^2$ |
|------------|-------------------------------|----------------------------|
| Q1         | 0.001                         | 0.006                      |
| <b>Q2</b>  | <b>0.001</b>                  | <b>0.007</b>               |
| Q3         | 0.001                         | 0.007                      |
| Q4         | 0.004                         | 0.007                      |
| Q5         | 0.016                         | 0.009                      |
| Q6         | 0.009                         | 0.004                      |
| Q7         | 0.006                         | 0.007                      |
| Q8         | 0.001                         | 0.009                      |
| Q9         | 0.034                         | 0.006                      |
| Q10        | 0.001                         | 0.010                      |
| Q11        | 0.001                         | 0.006                      |
| Q12        | 0.002                         | 0.006                      |
| Q13        | 0.010                         | 0.004                      |
| Q14        | 0.023                         | 0.005                      |
| Q15        | 0.016                         | 0.005                      |
| Q16        | 0.001                         | 0.016                      |
| Q17        | 0.001                         | 0.010                      |
| Q18        | 0.015                         | 0.004                      |
| Q19        | 0.033                         | 0.003                      |
| <b>Q20</b> | <b>0.004</b>                  | <b>0.005</b>               |
| Q21        | 0.016                         | 0.004                      |
| Q22        | 0.002                         | 0.006                      |
| <b>Q23</b> | <b>0.007</b>                  | <b>0.006</b>               |
| Q24        | 0.017                         | 0.004                      |
| Q25        | 0.006                         | 0.006                      |
| Q26        | 0.028                         | 0.004                      |
| Q27        | 0.008                         | 0.004                      |
| Q28        | 0.003                         | 0.006                      |
| Q29        | 0.014                         | 0.005                      |
| Q30        | 0.002                         | 0.006                      |

The values displayed represent the 99<sup>th</sup>-percentile threshold values for chi-square *p*-values and McFadden's  $\Delta R^2$  values, obtained from Monte Carlo simulations under the assumption that there is no DIF. When the values found in the empirical data set are more extreme (i.e., smaller *p*-value and larger  $\Delta R^2$  value) than those found in the Monte Carlo simulations, this suggests there is DIF. Items flagged for DIF are displayed italic in blue.
